# Supplementary material
Source: PubMed Central journal article supplement (PMC4790021)
Supplement: stos002823.ww1_default.pdf [file stos002823.ww1_default.pdf]

**Web appendix: Supplementary information**

**(i) Histogram of estimated average incidence rate ratio**

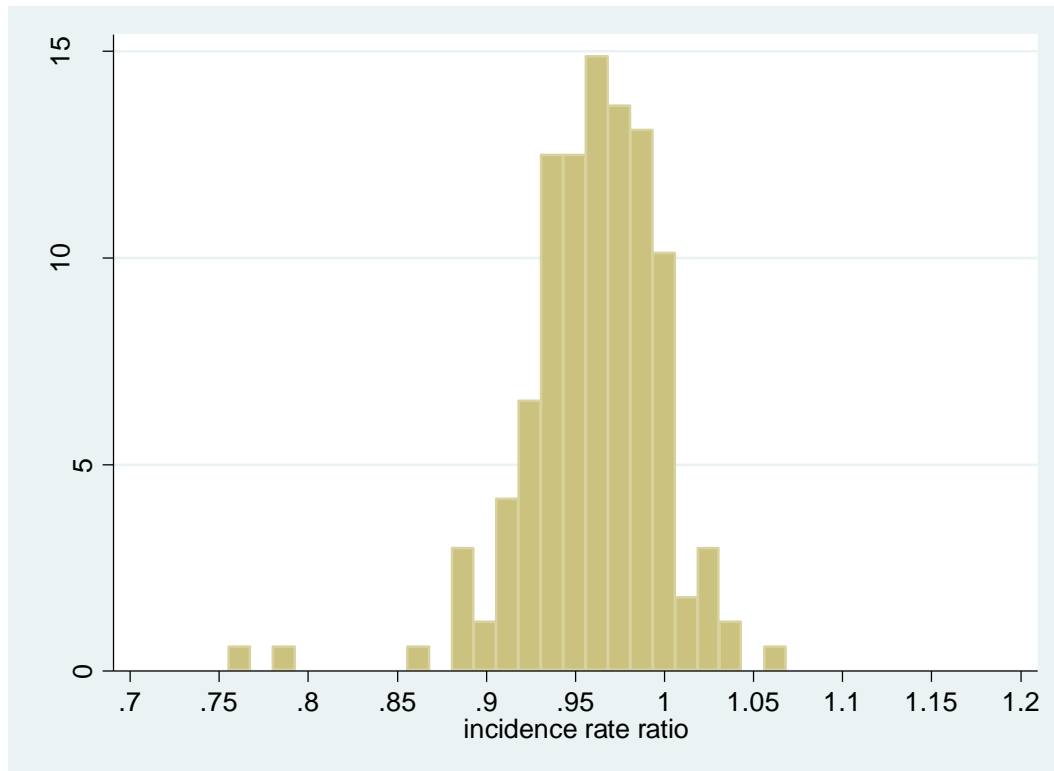

**(ii) Histogram of estimated MRSAB rate**

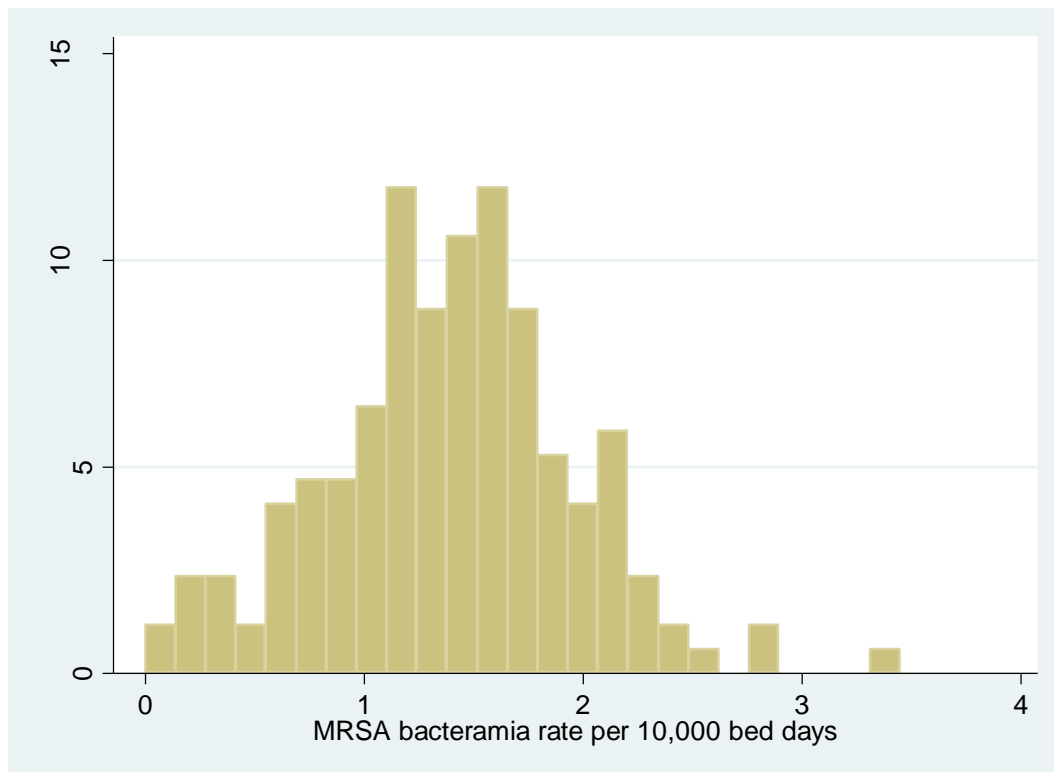

**(iii) Scatter plot of average quarterly change in incidence rate ration against pooled MRSAB rate over all quarters**

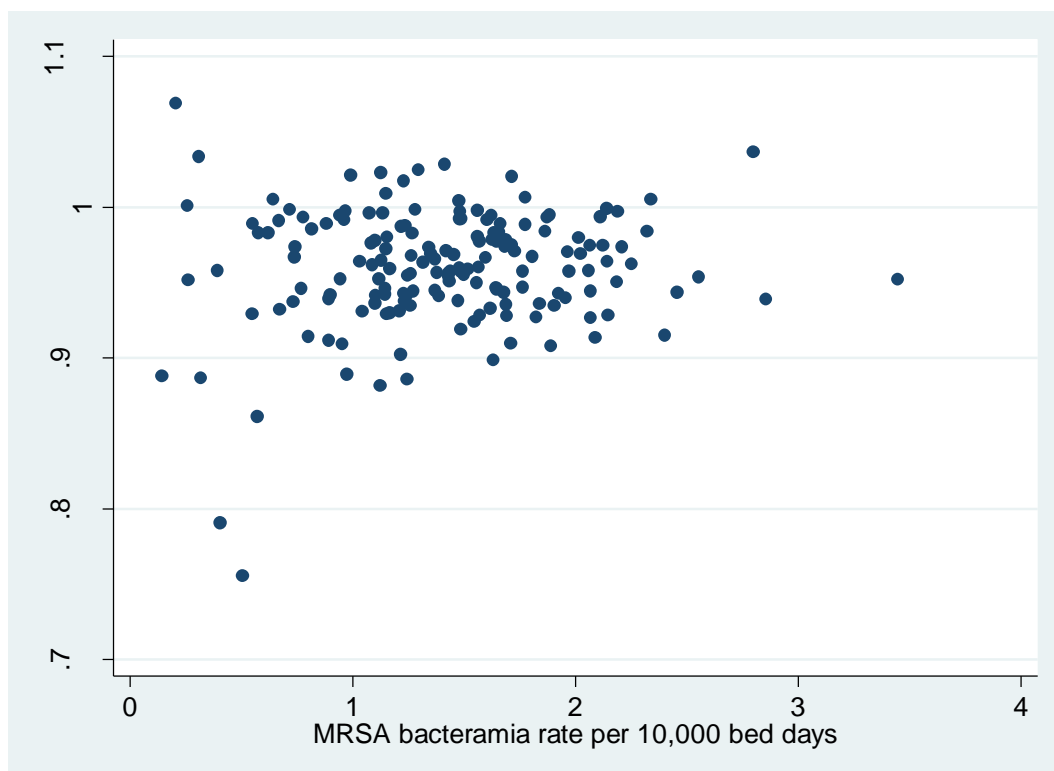

Estimated IRR for CDI for a 1 ml per bed day increase in AHR by quarter

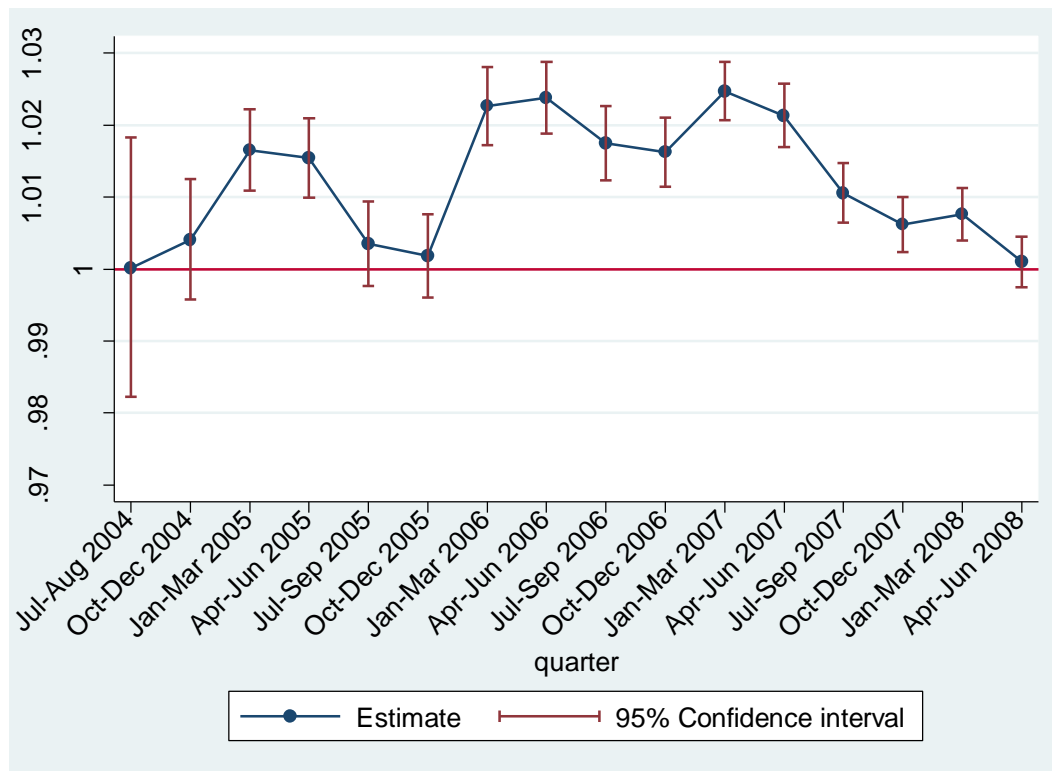

### Information available from authors regarding evidence for collinearity which might explain different trends in AHR and soap for CDI

There was strong positive correlation between soap and AHR for most trusts. In a simplified model if AHR is included alone there is as expected an negative association, more AHR lower CDI infections but AHR is likely to be acting as a proxy for soap.

| cdiff        | IRR      | Std. Err. | z      | P> z  | [95% Conf. Interval] |          |
|--------------|----------|-----------|--------|-------|----------------------|----------|
| ahr_rate     | .99729   | .0012432  | -2.18  | 0.029 | .9948563             | .9997296 |
| healthact    | .8761426 | .0235249  | -4.92  | 0.000 | .8312269             | .9234854 |
| _Isaving_l~1 | .9714076 | .0363572  | -0.78  | 0.438 | .9026996             | 1.045345 |
| _Isaving_l~2 | 1.130174 | .0293394  | 4.71   | 0.000 | 1.074108             | 1.189166 |
| _Iimp_team_1 | 1.038592 | .0473717  | 0.83   | 0.406 | .9497748             | 1.135716 |
| _Iimp_team_2 | 1.03171  | .0482152  | 0.67   | 0.504 | .9414085             | 1.130673 |
| _Iimp_team_3 | 1.018129 | .0489342  | 0.37   | 0.709 | .9265984             | 1.118701 |
| _Iimp_team_4 | .8300601 | .0279145  | -5.54  | 0.000 | .7771128             | .886615  |
| _Icategory_2 | .0302993 | .0052515  | -20.17 | 0.000 | .0215726             | .0425563 |
| _Icategory_3 | 1.441694 | .1961826  | 2.69   | 0.007 | 1.104189             | 1.88236  |

Soap is also negatively associated when included alone.

| cdiff        | IRR      | Std. Err. | z      | P> z  | [95% Conf. Interval] |          |
|--------------|----------|-----------|--------|-------|----------------------|----------|
| soap_rate    | .9963024 | .0008587  | -4.30  | 0.000 | .9946207             | .9979869 |
| healthact    | .9116977 | .0282722  | -2.98  | 0.003 | .8579356             | .9688288 |
| _Isaving_l~1 | .9597508 | .0396689  | -0.99  | 0.320 | .885067              | 1.040736 |
| _Isaving_l~2 | 1.108008 | .0316261  | 3.59   | 0.000 | 1.047724             | 1.171761 |
| _Iimp_team_1 | 1.073239 | .0551437  | 1.38   | 0.169 | .9704235             | 1.186949 |
| _Iimp_team_2 | 1.072553 | .0565366  | 1.33   | 0.184 | .9672754             | 1.189289 |
| _Iimp_team_3 | 1.063165 | .0585742  | 1.11   | 0.266 | .9543424             | 1.184396 |
| _Iimp_team_4 | .8620557 | .0332724  | -3.85  | 0.000 | .7992486             | .9297984 |
| _Icategory_2 | .0286115 | .0056641  | -17.95 | 0.000 | .0194103             | .0421744 |
| _Icategory_3 | 1.348601 | .2071378  | 1.95   | 0.052 | .9980297             | 1.822315 |

When allowing for these together in the simplified model the AHR association is removed and only the negative association with soap remains. So although they are collinear and this may cause problems with the estimation the results are biologically plausible with would suggest that this isn't causing a major problem.

| cdiff        | IRR      | Std. Err. | z      | P> z  | [95% Conf. Interval] |          |
|--------------|----------|-----------|--------|-------|----------------------|----------|
| ahr_rate     | .9977479 | .0017942  | -1.25  | 0.210 | .9942376             | 1.001271 |
| soap_rate    | .9967082 | .0009148  | -3.59  | 0.000 | .9949169             | .9985028 |
| healthact    | .9374057 | .0307114  | -1.97  | 0.048 | .8791043             | .9995735 |
| _Isaving_l~1 | .9669622 | .0422754  | -0.77  | 0.442 | .8875547             | 1.053474 |
| _Isaving_l~2 | 1.10949  | .0342201  | 3.37   | 0.001 | 1.044407             | 1.178629 |
| _Iimp_team_1 | 1.055368 | .0569415  | 1.00   | 0.318 | .9494635             | 1.173086 |
| _Iimp_team_2 | 1.043489 | .0572679  | 0.78   | 0.438 | .9370721             | 1.161991 |
| _Iimp_team_3 | 1.023369 | .0587551  | 0.40   | 0.687 | .9144535             | 1.145256 |
| _Iimp_team_4 | .8348745 | .0338907  | -4.45  | 0.000 | .7710236             | .904013  |
| _Icategory_2 | .0275942 | .0055617  | -17.81 | 0.000 | .018589              | .0409619 |
| _Icategory_3 | 1.328385 | .2088589  | 1.81   | 0.071 | .9760941             | 1.807825 |

**(i) Associations from the Poisson mixed effects model for mandatory MSSA bacteraemia (see text in results section iii regarding MSSA)**

| Predictor                            | Estimated Incidence rate ratio | 95% confidence interval | P value |
|--------------------------------------|--------------------------------|-------------------------|---------|
| AHR rate per ml per bed-day          | 0.999                          | 0.997 to 1.002          | 0.6     |
| Soap rate per ml per bed per day     | 1.0029                         | 1.0014 to 1.0043        | 0.0001  |
| <b>Saving lives</b>                  |                                |                         |         |
| Prior quarters                       | Referent                       |                         |         |
| Quarter implemented                  | 1.01                           | 0.94 to 1.09            | 0.5     |
| Subsequent quarters                  | 1.05                           | 0.97 to 1.11            |         |
| <b>Improvement team visit (MRSA)</b> |                                |                         |         |
| Prior quarters                       | Referent                       |                         |         |
| Quarter before visit                 | 1.03                           | 0.95 to 1.11            | 0.3     |
| Quarter of visit                     | 0.92                           | 0.85 to 1.00            |         |
| Quarter post visit                   | 0.97                           | 0.89 to 1.05            |         |
| Subsequent quarters                  | 0.98                           | 0.92 to 1.04            |         |
| Health Act                           | 1.05                           | 0.99 to 1.13            | 0.13    |

**(ii) Associations between additional use of consumables and MRSA or CDI improvement team visits**

| Time relative to visit                                                 | Estimated additional quarterly usage of AHR |                               |
|------------------------------------------------------------------------|---------------------------------------------|-------------------------------|
|                                                                        | MRSA visit                                  | CDI visit                     |
| Prior quarters                                                         | referent                                    | referent                      |
| Quarter of visit                                                       | 0.96 (-1.22 to 3.13) p=0.39                 | -0.46 (-4.69 to 3.77) p=0.83  |
| Post visit                                                             | 0.81 (-0.67 to 2.29) p=0.28                 | 0.53 (-1.99 to 3.05) p=0.68   |
| <b>Estimated additional quarterly usage of soap</b>                    |                                             |                               |
| Prior quarters                                                         | referent                                    | referent                      |
| Quarter of visit                                                       | -1.47 (-7.15 to 4.20) p=0.61                | 0.14 (-10.56 to 10.85) p=0.98 |
| Post visit                                                             | -0.90 (-4.80 to 3.00) p=0.65                | -0.67 (-7.26 to 5.91) p=0.84  |
| <b>Estimated additional quarterly usage of soap &amp; AHR combined</b> |                                             |                               |
| Prior quarters                                                         | referent                                    | referent                      |
| Quarter of visit                                                       | -1.71 (-9.94 to 6.52) p=0.68                | 0.95 (-14.46 to 16.36) p=0.90 |
| Post visit                                                             | -1.16 (-6.79 to 4.47) p=0.69                | 1.13 (-8.21 to 10.47) p=0.81  |
